# Supplementary material for: Tumor-suppressive effects of atelocollagen-conjugated hsa-miR-520d-5p on un-differentiated cancer cells in a mouse xenograft model
Source: PubMed Central journal article supplement (PMC4936056; doi:10.1186/s12885-016-2467-y), 2016-07-07
Supplement: 12885_2016_2467_MOESM1_ESM.pdf [file 12885_2016_2467_MOESM1_ESM.pdf]

Table S1

Primers used in this study

| Gene           | Sense                   | Antisense            | product size (bp) |
|----------------|-------------------------|----------------------|-------------------|
| $\beta$ -actin | ACCTGACTGACTACCTCATG    | GCAGCCGTGGCCATCTCTTG | 146               |
| Oct4           | CGGAAAGAGAAAGCGAACCA    | CGGACCACATCCTTCTCCAG | 135               |
| Nanog          | CAGAAGGCCTCAGCACCTAC    | ACTGGATGTTCTGGGTCTGG | 145               |
| P53            | GCTTCGAGATGTTCCGAGAG    | TTATGGCGGGAGGTAGACTG | 133               |
| AICDA          | CGTAGTGAAGAGGCGTGACA    | TGTAGCGGAGGAAGAGCAAT | 102               |
| miR-520d-5p    | TCTACAAAGGGAAGCCCTTTCTG |                      |                   |
