# Supplementary material for: Tumor-suppressive effects of atelocollagen-conjugated hsa-miR-520d-5p on un-differentiated cancer cells in a mouse xenograft model
Source: PubMed Central journal article supplement (PMC4936056; doi:10.1186/s12885-016-2467-y), 2016-07-07

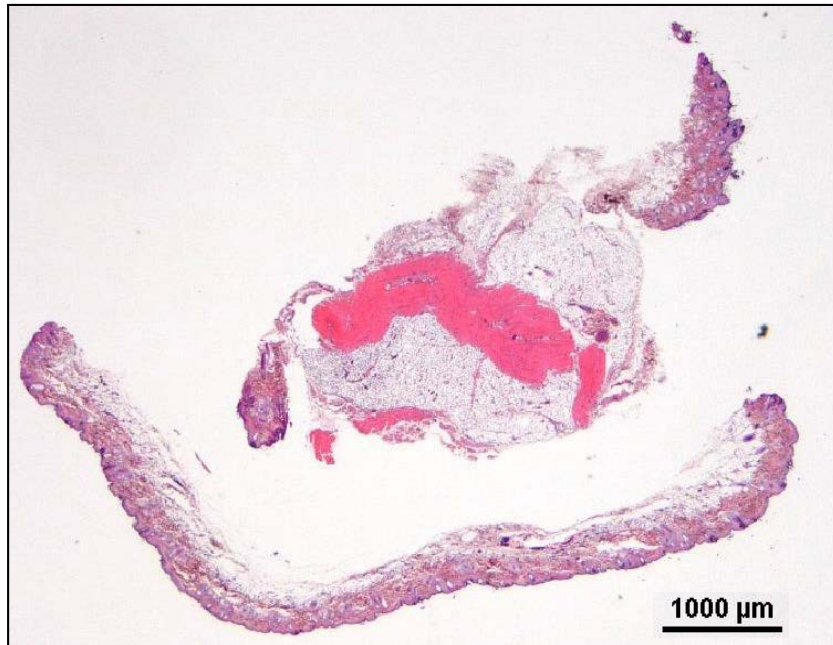

X40 s.c.

A representative case 24 weeks later subcutaneous injection. Pathologists recognized adipose tissue and a skeletal muscle thought to be the existing structure and cannot confirm the clear tumor ingredient at the injection site. We could not find any tumor macroscopically in this case.

X100 s.c.

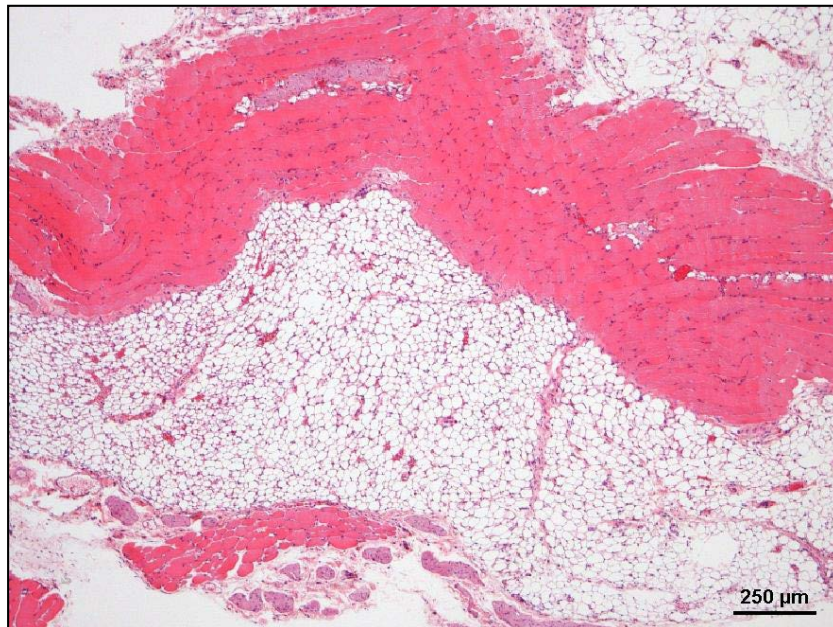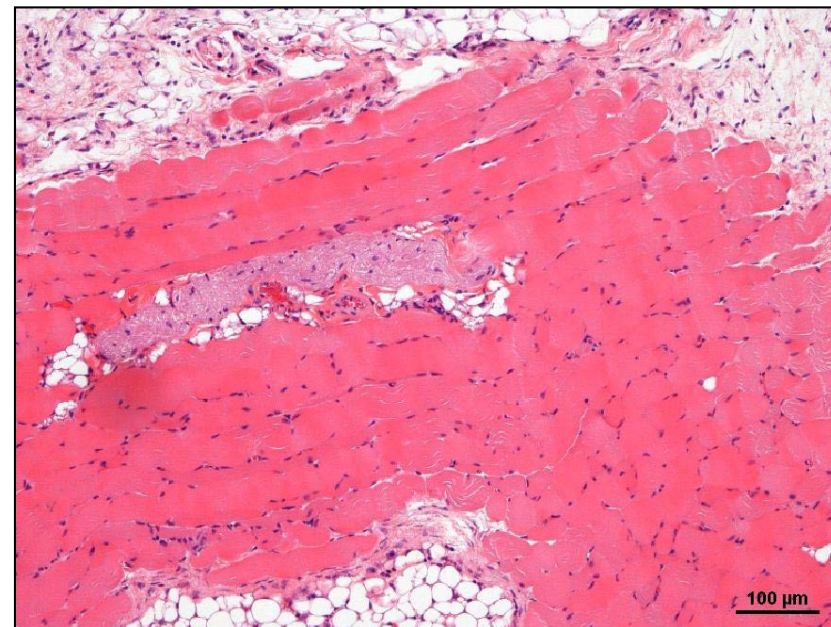

Supplement: 12885_2016_2467_MOESM2_ESM.pdf [file 12885_2016_2467_MOESM2_ESM.pdf]
