# Supplementary material for: Tumor-suppressive effects of atelocollagen-conjugated hsa-miR-520d-5p on un-differentiated cancer cells in a mouse xenograft model
Source: PubMed Central journal article supplement (PMC4936056; doi:10.1186/s12885-016-2467-y), 2016-07-07
Supplement: 12885_2016_2467_MOESM3_ESM.pdf [file 12885_2016_2467_MOESM3_ESM.pdf]

Table S2

Suppression rate (%) of tumor volume compared with control in each week

| cancer cells | 5W   | 6W   | 7W   | 8W   | 9W   | 10W  |
|--------------|------|------|------|------|------|------|
| HLF          | 66.6 | 86.9 | 86.9 | 90.6 | 94.0 | 92.7 |
| HMV-I        | 84.1 | 85.5 | 90   | 89.1 | 91.7 | 85.9 |
