# Supplementary material for: Tumor-suppressive effects of atelocollagen-conjugated hsa-miR-520d-5p on un-differentiated cancer cells in a mouse xenograft model
Source: PubMed Central journal article supplement (PMC4936056; doi:10.1186/s12885-016-2467-y), 2016-07-07
Supplement: 12885_2016_2467_MOESM4_ESM.pdf [file 12885_2016_2467_MOESM4_ESM.pdf]

Table S3

Effective rate (%) of tumor disappearance by systemic administration, compared with that of control

| cancer cells | Presence of intraperitoneal tumorous nodules |   | Effective rate<br>—/total number (%) |
|--------------|----------------------------------------------|---|--------------------------------------|
|              | +                                            | — |                                      |
| HLF          | 2                                            | 6 | 75.0                                 |
| HMV-I        | 1                                            | 7 | 87.5                                 |
