# Supplementary material for: Tumor-suppressive effects of atelocollagen-conjugated hsa-miR-520d-5p on un-differentiated cancer cells in a mouse xenograft model
Source: PubMed Central journal article supplement (PMC4936056; doi:10.1186/s12885-016-2467-y), 2016-07-07
Supplement: 12885_2016_2467_MOESM5_ESM.pdf [file 12885_2016_2467_MOESM5_ESM.pdf]

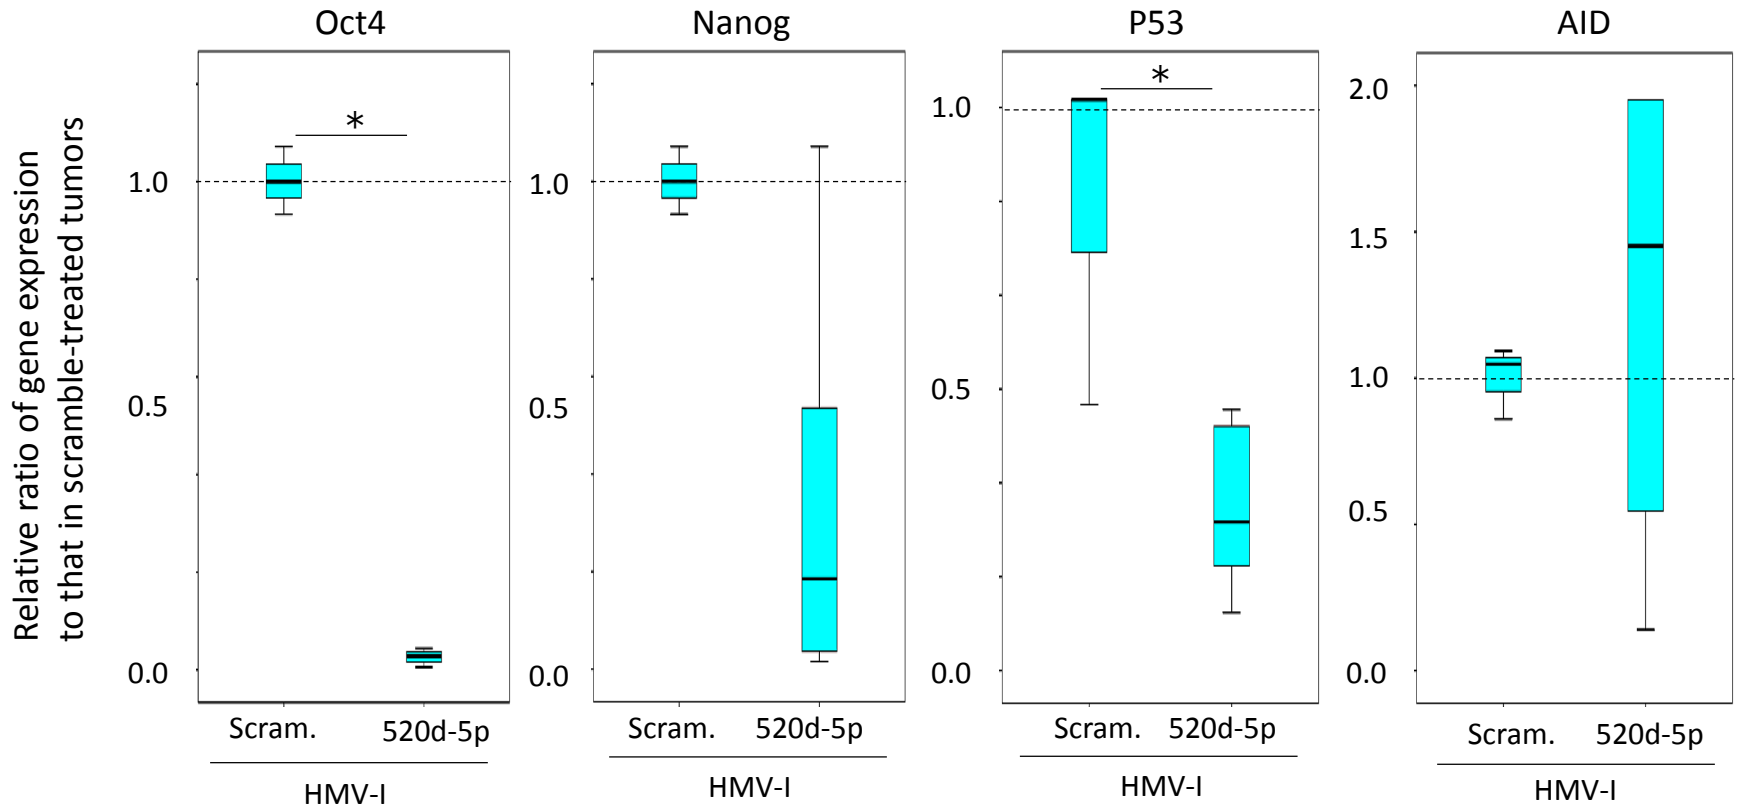

When the animals were sacrificed, most tumors grew increasingly and the suppressive effect of 520d-5p on tumor growth could not be observed by RT-PCR.

\*:  $P < 0.05$  by Man-Whitney  $U$  test
