# Supplementary material for: Tumor-suppressive effects of atelocollagen-conjugated hsa-miR-520d-5p on un-differentiated cancer cells in a mouse xenograft model
Source: PubMed Central journal article supplement (PMC4936056; doi:10.1186/s12885-016-2467-y), 2016-07-07
Supplement: 12885_2016_2467_MOESM6_ESM.pdf [file 12885_2016_2467_MOESM6_ESM.pdf]

Fig. S1

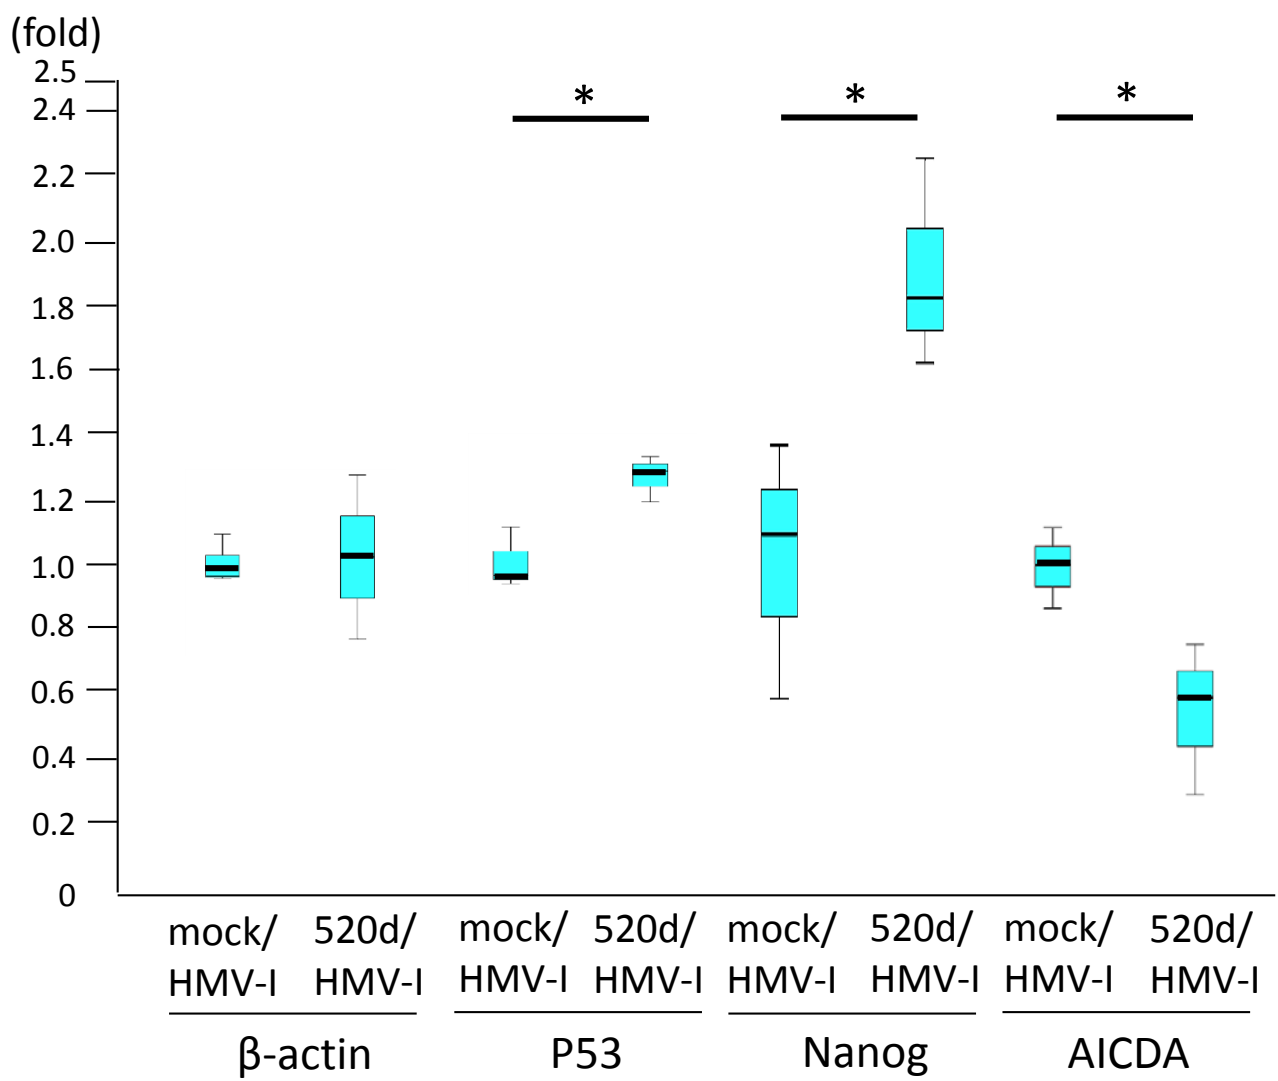

Representative gene expression profile in 520d/HMV-I is shown. Upregulation of P53 and Nanog, and downregulation of AICDA were observed in 520d/HMV-I *in vitro*, similar to those in 520d/HLF. \*: P<0.05 by one way ANOVA. Oct4 was not significantly upregulated, but weakly upregulated in western blotting.
