# Supplementary material for: Tumor-suppressive effects of atelocollagen-conjugated hsa-miR-520d-5p on un-differentiated cancer cells in a mouse xenograft model
Source: PubMed Central journal article supplement (PMC4936056; doi:10.1186/s12885-016-2467-y), 2016-07-07
Supplement: 12885_2016_2467_MOESM9_ESM.pdf [file 12885_2016_2467_MOESM9_ESM.pdf]

Table S4

Subcutaneous changes of 520d-5p-expressing HMV-I in a xenografted model

|                 | +           | -           |
|-----------------|-------------|-------------|
| tumor formation | 6/9 (66.7%) | 3/9 (33.3%) |
| metastasis      | 0/9 (0%)    | 9/9 (100%)  |

6/9 (66.7%) was suppressed the growth, compared with mock-transfected cells or parental cells
