# Supplementary material for: Tumor-suppressive effects of atelocollagen-conjugated hsa-miR-520d-5p on un-differentiated cancer cells in a mouse xenograft model
Source: PubMed Central journal article supplement (PMC4936056; doi:10.1186/s12885-016-2467-y), 2016-07-07
Supplement: 12885_2016_2467_MOESM10_ESM.pdf [file 12885_2016_2467_MOESM10_ESM.pdf]

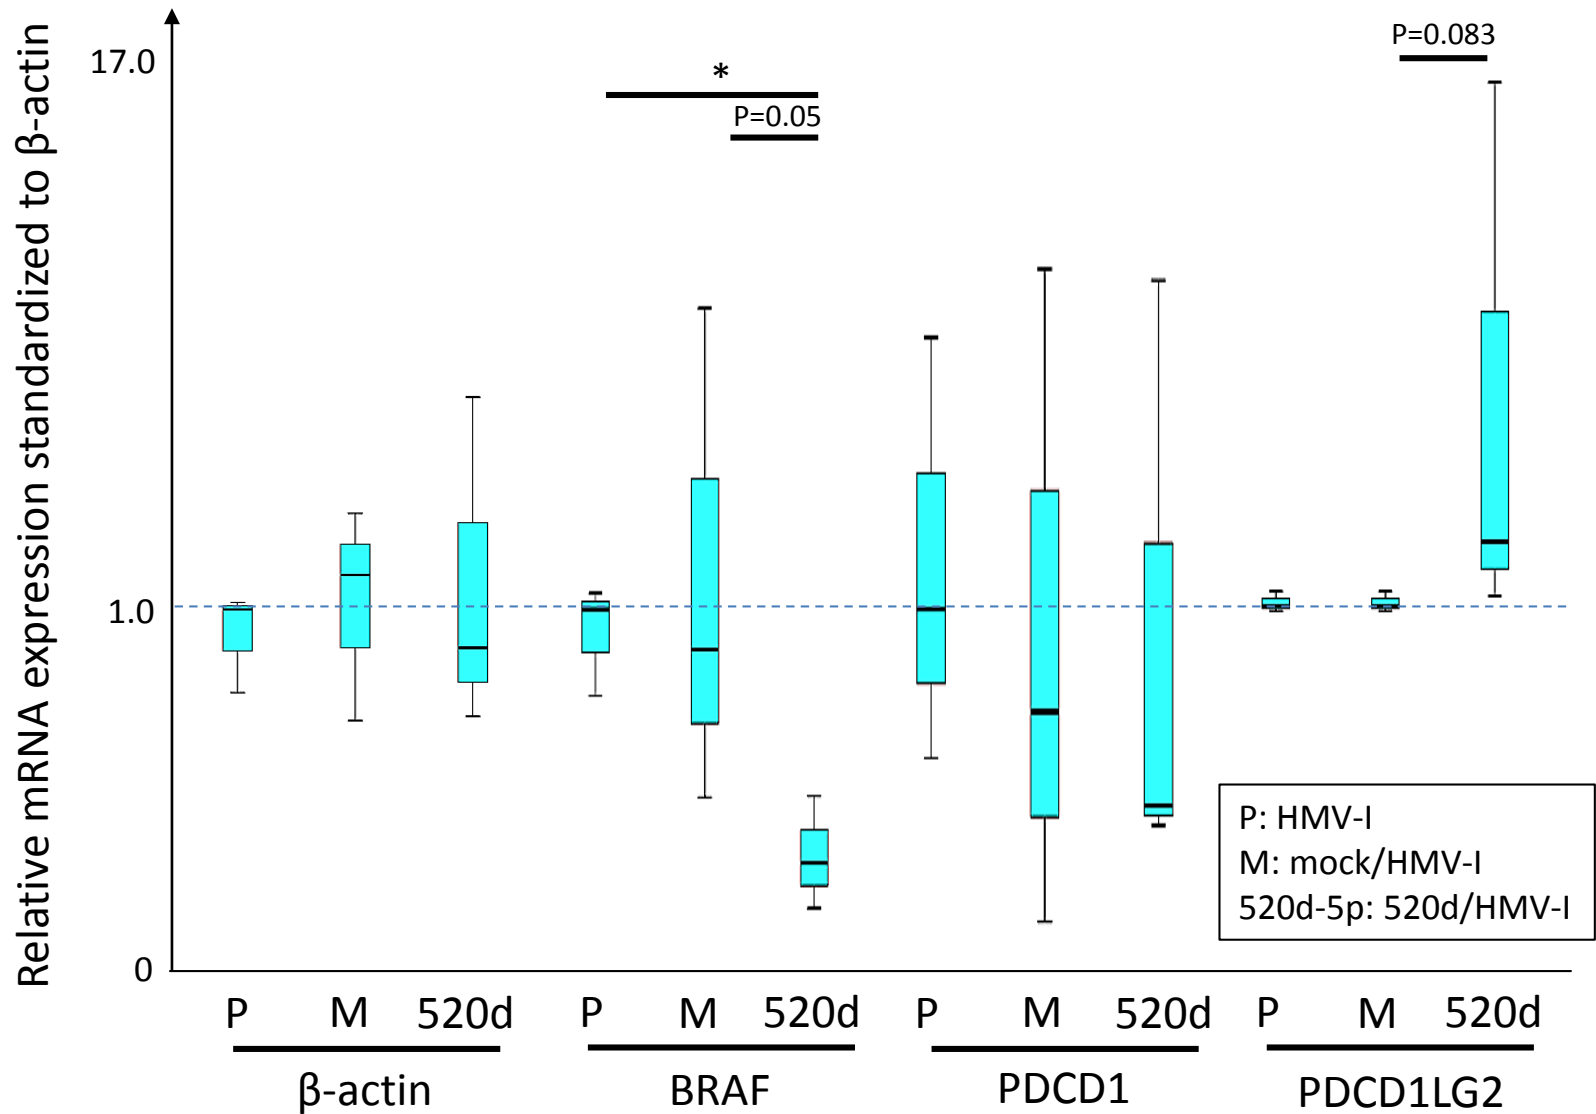

Relative mRNA expression of BRAF, PDCD1 and PDCD1LG2 standardized to  $\beta$ -actin were shown. Box plot was drawn compared with the expression in HMV-I cells. BRAF was not significantly downregulated in 520d/HMV-I, compared with mock/HMV-I (by Mann-Whitney  $U$  test,  $n=3$ ), but it tended to be downregulated by 520d-5p. \*:  $P < 0.05$ .
